# Supplementary material
Source: PubMed Central journal article supplement (PMC2733353)
Supplement: NIHMS140468-supplement-etables.pdf [file NIHMS140468-supplement-etables.pdf]

## Supplementary Online Content

Chen X, Williamson VS, An S-S, Hettema JM, Aggen SH, Neale MC, Kendler KS. Cannabinoid receptor 1 gene association with nicotine dependence. *Arch Gen Psychiatry*. 2008;65(7):816-824.

**eTable 1.** Sex-Stratified Haplotype Analyses of the VAND Sample

**eTable 2.** Sex-Stratified Analyses of the VAANX Sample

**eTable 1. Sex-Stratified Haplotype Analyses of the VAND Sample**

| Marker Combination         | Global P Value <sup>a</sup> | Haplotype | Case Frequency | Control Frequency | OR     | Haplotype P Value <sup>a</sup> |
|----------------------------|-----------------------------|-----------|----------------|-------------------|--------|--------------------------------|
| <b>Smoking Initiation</b>  |                             |           |                |                   |        |                                |
| <b>Men</b>                 |                             |           |                |                   |        |                                |
| 5-8                        | .14                         | 1-1       | 0.60           | 0.62              | 0.92   | .89                            |
|                            |                             | 1-2       | 0.19           | 0.17              | 1.17   | .76                            |
|                            |                             | 2-1       | 0.15           | 0.11              | 1.46   | .23                            |
|                            |                             | 2-2       | 0.06           | 0.11              | 0.53   | .08                            |
| 7-9-10                     | .83                         | 1-1-1     | 0.62           | 0.59              | 1.15   | .29                            |
|                            |                             | 1-1-2     | 0.09           | 0.08              | 1.13   | .58                            |
|                            |                             | 1-2-1     | 0.01           | 0.01              | 1.23   | .85                            |
|                            |                             | 1-2-2     | 0.07           | 0.09              | 0.71   | .16                            |
|                            |                             | 2-1-1     | 0.16           | 0.17              | 0.87   | .46                            |
|                            |                             | 2-1-2     | 0.04           | 0.04              | 1.07   | .97                            |
|                            |                             | 2-2-2     | 0.00           | 0.01              | 0.40   | .29                            |
| 5-7-9-10                   | .82                         | 1-1-1-1   | 0.62           | 0.59              | 1.15   | .33                            |
|                            |                             | 1-1-1-2   | 0.09           | 0.09              | 1.08   | .68                            |
|                            |                             | 1-1-2-1   | 0.01           | 0.01              | 0.95   | .89                            |
|                            |                             | 1-1-2-2   | 0.07           | 0.09              | 0.73   | .25                            |
|                            |                             | 2-2-1-1   | 0.15           | 0.17              | 0.86   | .48                            |
|                            |                             | 2-2-1-2   | 0.04           | 0.04              | 1.09   | .95                            |
|                            |                             | 2-2-2-2   | 0.01           | 0.01              | 1.06   | .23                            |
| <b>Women</b>               |                             |           |                |                   |        |                                |
| 5-8                        | .007 <sup>a</sup>           | 1-1       | 0.56           | 0.58              | 0.95   | .90                            |
|                            |                             | 1-2       | 0.30           | 0.18              | 2.01   | .006 <sup>a</sup>              |
|                            |                             | 2-1       | 0.09           | 0.17              | 0.45   | .004 <sup>a</sup>              |
|                            |                             | 2-2       | 0.05           | 0.08              | 0.62   | .30                            |
| 7-9-10                     | .13                         | 1-1-1     | 0.70           | 0.58              | 1.64   | .02 <sup>a</sup>               |
|                            |                             | 1-1-2     | 0.08           | 0.10              | 0.80   | .50                            |
|                            |                             | 1-2-1     | 0.01           | 0.00              | >20.00 | .64                            |
|                            |                             | 1-2-2     | 0.07           | 0.08              | 0.86   | .94                            |
|                            |                             | 2-1-1     | 0.10           | 0.18              | 0.52   | .03 <sup>a</sup>               |
|                            |                             | 2-1-2     | 0.01           | 0.04              | 0.36   | .06                            |
|                            |                             | 2-2-2     | 0.02           | 0.01              | 2.52   | .89                            |
| 5-7-9-10                   | .12                         | 1-1-1-1   | 0.70           | 0.59              | 1.62   | .02 <sup>a</sup>               |
|                            |                             | 1-1-1-2   | 0.08           | 0.10              | 0.80   | .49                            |
|                            |                             | 1-1-2-1   | 0.01           | 0.00              | >20.00 | .65                            |
|                            |                             | 1-1-2-2   | 0.06           | 0.08              | 0.84   | .94                            |
|                            |                             | 2-2-1-1   | 0.10           | 0.18              | 0.52   | .03 <sup>a</sup>               |
|                            |                             | 2-2-1-2   | 0.02           | 0.04              | 0.40   | .07                            |
|                            |                             | 2-2-2-2   | 0.03           | 0.01              | 2.28   | .64                            |
| <b>Nicotine Dependence</b> |                             |           |                |                   |        |                                |
| <b>Men</b>                 |                             |           |                |                   |        |                                |
| 5-8                        | .40                         | 1-1       | 0.63           | 0.56              | 1.32   | .18                            |
|                            |                             | 1-2       | 0.18           | 0.20              | 0.86   | .75                            |
|                            |                             | 2-1       | 0.12           | 0.18              | 0.65   | .15                            |

|          |                    |         |      |      |      |                    |
|----------|--------------------|---------|------|------|------|--------------------|
|          |                    | 2-2     | 0.07 | 0.06 | 1.19 | .86                |
| 7-9-10   | .29                | 1-1-1   | 0.62 | 0.63 | 0.97 | .85                |
|          |                    | 1-1-2   | 0.10 | 0.09 | 1.14 | .74                |
|          |                    | 1-2-1   | 0.03 | 0.00 | 6.29 | .04 <sup>a</sup>   |
|          |                    | 1-2-2   | 0.08 | 0.05 | 1.55 | .30                |
|          |                    | 2-1-1   | 0.14 | 0.17 | 0.81 | .18                |
|          |                    | 2-1-2   | 0.03 | 0.05 | 0.69 | .33                |
|          |                    | 2-2-2   | 0.00 | 0.01 | 0.00 | .60                |
| 5-7-9-10 | .37                | 1-1-1-1 | 0.62 | 0.62 | 0.99 | .84                |
|          |                    | 1-1-1-2 | 0.10 | 0.09 | 1.19 | .67                |
|          |                    | 1-1-2-1 | 0.02 | 0.00 | 4.93 | .10                |
|          |                    | 1-1-2-2 | 0.08 | 0.06 | 1.36 | .31                |
|          |                    | 2-2-1-1 | 0.14 | 0.17 | 0.81 | .24                |
|          |                    | 2-2-1-2 | 0.03 | 0.05 | 0.65 | .31                |
|          |                    | 2-2-2-2 | 0.00 | 0.00 | 0.55 | .79                |
| Women    |                    |         |      |      |      |                    |
| 5-8      | <.001 <sup>a</sup> | 1-1     | 0.67 | 0.42 | 2.85 | <.001 <sup>a</sup> |
|          |                    | 1-2     | 0.23 | 0.40 | 0.46 | .006 <sup>a</sup>  |
|          |                    | 2-1     | 0.06 | 0.12 | 0.52 | .19                |
|          |                    | 2-2     | 0.03 | 0.07 | 0.43 | .03 <sup>a</sup>   |
| 7-9-10   | .002 <sup>a</sup>  | 1-1-1   | 0.72 | 0.68 | 1.22 | .44                |
|          |                    | 1-1-2   | 0.12 | 0.02 | 6.93 | <.001 <sup>a</sup> |
|          |                    | 1-2-1   | 0.00 | 0.02 | 0.00 | .04 <sup>a</sup>   |
|          |                    | 1-2-2   | 0.06 | 0.08 | 0.70 | .38                |
|          |                    | 2-1-1   | 0.06 | 0.15 | 0.40 | .02 <sup>a</sup>   |
|          |                    | 2-1-2   | 0.03 | 0.01 | 2.24 | .23                |
|          |                    | 2-2-2   | 0.01 | 0.04 | 0.33 | .12                |
| 5-7-9-10 | .001 <sup>a</sup>  | 1-1-1-1 | 0.73 | 0.68 | 1.25 | .33                |
|          |                    | 1-1-1-2 | 0.12 | 0.02 | 7.99 | <.001 <sup>a</sup> |
|          |                    | 1-1-2-1 | 0.00 | 0.02 | 0.00 | .04 <sup>a</sup>   |
|          |                    | 1-1-2-2 | 0.06 | 0.08 | 0.72 | .44                |
|          |                    | 2-2-1-1 | 0.06 | 0.15 | 0.37 | .01 <sup>a</sup>   |
|          |                    | 2-2-1-2 | 0.03 | 0.01 | 1.93 | .31                |
|          |                    | 2-2-2-2 | 0.01 | 0.04 | 0.30 | .09                |

Abbreviations: OR, odds ratio; VAND, Virginia Study of Nicotine Dependence.

<sup>a</sup> $P < .05$ .

**eTable 2. Sex-Stratified Analyses of the VAANX Sample**

| Marker Combination        | Global <i>P</i> Value <sup>a</sup> | Haplotype | Case Frequency | Control Frequency | OR     | Haplotype <i>P</i> Value |
|---------------------------|------------------------------------|-----------|----------------|-------------------|--------|--------------------------|
| <b>Smoking Initiation</b> |                                    |           |                |                   |        |                          |
| <b>Men</b>                |                                    |           |                |                   |        |                          |
| 7-9-10                    | .64                                | 1-1-1     | 0.64           | 0.65              | 0.96   | .77                      |
|                           |                                    | 1-1-2     | 0.09           | 0.09              | 1.01   | .70                      |
|                           |                                    | 1-2-1     | 0.01           | 0.01              | 1.08   | .89                      |
|                           |                                    | 1-2-2     | 0.08           | 0.06              | 1.44   | .24                      |
|                           |                                    | 2-1-1     | 0.13           | 0.15              | 0.89   | .45                      |
|                           |                                    | 2-1-2     | 0.03           | 0.02              | 1.34   | .71                      |
|                           |                                    | 2-2-2     | 0.01           | 0.02              | 0.36   | .38                      |
| 5-7-9-10                  | .86                                | 1-1-1-1   | 0.64           | 0.64              | 0.97   | .81                      |
|                           |                                    | 1-1-1-2   | 0.09           | 0.09              | 1.02   | .72                      |
|                           |                                    | 1-1-2-1   | 0.01           | 0.01              | 0.86   | .63                      |
|                           |                                    | 1-1-2-2   | 0.08           | 0.06              | 1.31   | .31                      |
|                           |                                    | 1-2-1-1   | 0.00           | 0.00              | 0.86   | .22                      |
|                           |                                    | 1-2-2-1   | 0.00           | 0.00              | 0.86   | .22                      |
|                           |                                    | 1-2-2-2   | 0.00           | 0.00              | 0.86   | .20                      |
|                           |                                    | 2-1-1-1   | 0.01           | 0.01              | 0.86   | .92                      |
|                           |                                    | 2-1-1-2   | 0.00           | 0.00              | 0.86   | >.99                     |
|                           |                                    | 2-2-1-1   | 0.13           | 0.14              | 0.89   | .49                      |
|                           |                                    | 2-2-1-2   | 0.03           | 0.03              | 1.27   | .68                      |
|                           |                                    | 2-2-2-2   | 0.01           | 0.01              | 0.58   | .74                      |
| <b>Women</b>              |                                    |           |                |                   |        |                          |
| 7-9-10                    | .12                                | 1-1-1     | 0.60           | 0.65              | 0.81   | .19                      |
|                           |                                    | 1-1-2     | 0.11           | 0.09              | 1.22   | .93                      |
|                           |                                    | 1-2-1     | 0.01           | 0.01              | 0.68   | .58                      |
|                           |                                    | 1-2-2     | 0.05           | 0.09              | 0.54   | .17                      |
|                           |                                    | 2-1-1     | 0.19           | 0.12              | 1.72   | .008 <sup>a</sup>        |
|                           |                                    | 2-1-2     | 0.01           | 0.03              | 0.43   | .90                      |
|                           |                                    | 2-2-1     | 0.01           | 0.01              | 1.11   | .80                      |
|                           |                                    | 2-2-2     | 0.02           | 0.01              | 4.41   | .35                      |
| 5-7-9-10                  | .02 <sup>a</sup>                   | 1-1-1-1   | 0.58           | 0.64              | 0.78   | .14                      |
|                           |                                    | 1-1-1-2   | 0.11           | 0.09              | 1.22   | .96                      |
|                           |                                    | 1-1-2-1   | 0.01           | 0.01              | 0.67   | .62                      |
|                           |                                    | 1-1-2-2   | 0.04           | 0.09              | 0.48   | .11                      |
|                           |                                    | 1-2-1-1   | 0.03           | 0.00              | 7.56   | .02 <sup>a</sup>         |
|                           |                                    | 1-2-2-1   | 0.00           | 0.01              | 0.67   | .74                      |
|                           |                                    | 1-2-2-2   | 0.00           | 0.01              | 0.67   | .36                      |
|                           |                                    | 2-1-1-1   | 0.02           | 0.01              | 1.60   | .44                      |
|                           |                                    | 2-1-1-2   | 0.00           | 0.00              | 0.67   | .20                      |
|                           |                                    | 2-2-1-1   | 0.17           | 0.11              | 1.66   | .02 <sup>a</sup>         |
|                           |                                    | 2-2-1-2   | 0.01           | 0.03              | 0.48   | .94                      |
|                           |                                    | 2-2-2-2   | 0.02           | 0.00              | >20.00 | .26                      |
| <b>FTND</b>               |                                    |           |                |                   |        |                          |
| <b>Men</b>                |                                    |           |                |                   |        |                          |

|          |                  |         |      |    |    |                    |
|----------|------------------|---------|------|----|----|--------------------|
| 9-10     | .60              | 1-1     | 0.79 | NA | NA | .38                |
|          |                  | 1-2     | 0.13 | NA | NA | .42                |
|          |                  | 2-1     | 0.01 | NA | NA | >.99               |
|          |                  | 2-2     | 0.08 | NA | NA | .72                |
| 7-9-10   | .56              | 1-1-1   | 0.65 | NA | NA | .97                |
|          |                  | 1-1-2   | 0.10 | NA | NA | .55                |
|          |                  | 1-2-1   | 0.01 | NA | NA | >.99               |
|          |                  | 1-2-2   | 0.07 | NA | NA | .74                |
|          |                  | 2-1-1   | 0.13 | NA | NA | .31                |
|          |                  | 2-1-2   | 0.02 | NA | NA | .46                |
|          |                  | 2-2-2   | 0.01 | NA | NA | >.99               |
| 5-7-9-10 | .50              | 1-1-1-1 | 0.64 | NA | NA | .84                |
|          |                  | 1-1-1-2 | 0.11 | NA | NA | .90                |
|          |                  | 1-1-2-1 | 0.01 | NA | NA | >.99               |
|          |                  | 1-1-2-2 | 0.07 | NA | NA | .49                |
|          |                  | 2-1-1-1 | 0.01 | NA | NA | .96                |
|          |                  | 2-2-1-1 | 0.13 | NA | NA | .37                |
|          |                  | 2-2-1-2 | 0.02 | NA | NA | .74                |
|          |                  | 2-2-2-2 | 0.01 | NA | NA | >.99               |
| Women    |                  |         |      |    |    |                    |
| 9-10     | .01 <sup>a</sup> | 1-1     | 0.79 | NA | NA | .06                |
|          |                  | 1-2     | 0.13 | NA | NA | .002 <sup>a</sup>  |
|          |                  | 2-1     | 0.01 | NA | NA | <.001 <sup>a</sup> |
|          |                  | 2-2     | 0.07 | NA | NA | .97                |
| 7-9-10   | .14              | 1-1-1   | 0.60 | NA | NA | .23                |
|          |                  | 1-1-2   | 0.11 | NA | NA | .009 <sup>a</sup>  |
|          |                  | 1-2-1   | 0.00 | NA | NA | >.99               |
|          |                  | 1-2-2   | 0.04 | NA | NA | .59                |
|          |                  | 2-1-1   | 0.19 | NA | NA | .54                |
|          |                  | 2-1-2   | 0.02 | NA | NA | <.001 <sup>a</sup> |
|          |                  | 2-2-1   | 0.01 | NA | NA | <.001 <sup>a</sup> |
|          |                  | 2-2-2   | 0.03 | NA | NA | .35                |
| 5-7-9-10 | .04 <sup>a</sup> | 1-1-1-1 | 0.59 | NA | NA | .26                |
|          |                  | 1-1-1-2 | 0.10 | NA | NA | .01 <sup>a</sup>   |
|          |                  | 1-1-2-1 | 0.01 | NA | NA | >.99               |
|          |                  | 1-1-2-2 | 0.04 | NA | NA | .87                |
|          |                  | 1-2-1-1 | 0.02 | NA | NA | .32                |
|          |                  | 2-1-1-1 | 0.02 | NA | NA | .49                |
|          |                  | 2-1-1-2 | 0.01 | NA | NA | <.001 <sup>a</sup> |
|          |                  | 2-2-1-1 | 0.16 | NA | NA | .51                |
|          |                  | 2-2-1-2 | 0.02 | NA | NA | <.001 <sup>a</sup> |
|          |                  | 2-2-2-1 | 0.01 | NA | NA | .005 <sup>a</sup>  |
|          |                  | 2-2-2-2 | 0.02 | NA | NA | .58                |

Abbreviations: FTND, Fagerström Test for Nicotine Dependence; NA, not applicable; OR, odds ratio; VAANX, Virginia Study of Anxiety and Neuroticism.

<sup>a</sup> $P < .05$ .
